# Supplementary material for: Estimation of the Effect of Salt-Intake Reduction on Cardiovascular Mortality Decline between 1950 and 2017 in Japan: A Retrospective Simulation Study
Source: MDPI journal article supplement (doi:10.3390/nu14183747), 2022-09-10
Supplement: s1 [file s1]

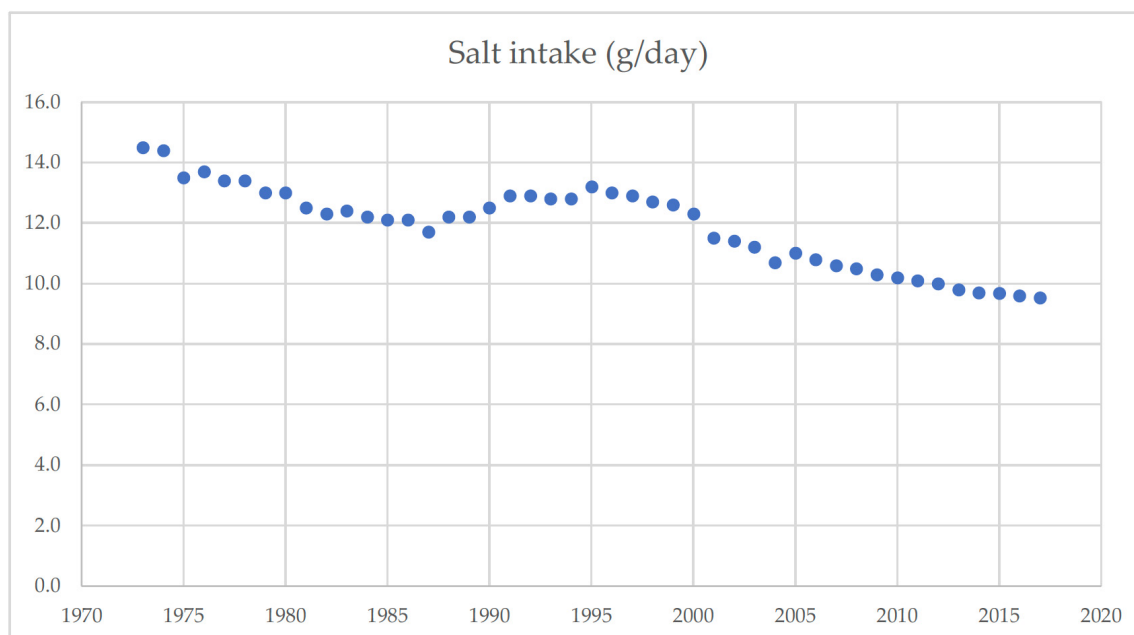

**Supplementary Figure S1.** The yearly trend of average salt intake in adults in Japan. From the National Nutrition Surveys in 1973–2002 and the National Health and Nutrition Surveys in 2003–2017 [1]. The bullets represent the averages of salt intake by year in the surveys.

1. Ministry of Health, Labour and Welfare. The National Health and Nutrition Survey. Available online: [https://www.mhlw.go.jp/bunya/kenkou/kenkou\\_eiyoushou.html](https://www.mhlw.go.jp/bunya/kenkou/kenkou_eiyoushou.html) (accessed on 5 September 2022).
